# Supplementary material for: Pulse pressure is associated with cognitive performance in Japanese non-demented population: a cross-sectional study
Source: Springer Nature journal article supplement (doi:10.1186/s12883-022-02666-6), 2022-04-11
Supplement: MOESM1 [file 20302088]

1 Supplemental table.

2 Physical, brain, and cognitive assessment in participants with lower and higher pulse

3 pressure before matching

|                                               | Pulse pressure (mmHg) |                     |                      |
|-----------------------------------------------|-----------------------|---------------------|----------------------|
|                                               | Lower (<65)           | Higher ( $\geq$ 65) | p value <sup>a</sup> |
| Systolic BP (mmHg)                            | 124.3(14.3)           | 149.9(14.2)         | <0.001               |
| Diastolic BP (mmHg)                           | 72.8(11.2)            | 75.8(11.5)          | <0.001               |
| PP (mmHg)                                     | 51.5(8.0)             | 74.1(7.3)           | <0.001               |
| SBI                                           | 111 (5.3)             | 45 (10.3)           | <0.001               |
| PVH grade $\geq$ 3                            | 119 (5.6)             | 51 (11.6)           | <0.001               |
| SWML                                          | 398 (18.9)            | 146 (33.3)          | <0.001               |
| CMBs                                          | 119 (5.6)             | 32 (7.3)            | 0.184                |
| Okabe's test (shortened<br>version of WAIS-R) | 45.3 (7.1)            | 42.7 (7.5)          | <0.001               |
| Information                                   | 16.3 (2.7)            | 15.9 (2.8)          | 0.005                |
| Mental control                                | 12.2 (3.8)            | 11.0 (4.1)          | <0.001               |
| Digit span                                    | 9.1 (1.3)             | 8.8 (1.5)           | <0.001               |
| Assoc. learning                               | 7.6 (3.1)             | 7.0 (3.1)           | <0.001               |

|              |              |             |        |
|--------------|--------------|-------------|--------|
| Kohs' test   | 103.0 (18.3) | 94.7 (18.1) | <0.001 |
| FAB          | 16.1 (1.5)   | 15.6 (1.5)  | <0.001 |
| SDS          | 34.8 (7.5)   | 33.8 (7.7)  | 0.014  |
| Apathy scale | 11.2 (5.7)   | 11.2 (5.7)  | 0.995  |

---

1 Abbreviation: BP, blood pressure; SBI, silent brain infarction; PVH, periventricular  
2 hyperintensity; SWML, subcortical white matter hyperintensity; CMBs, cerebral  
3 microbleeds; WAIS-R, Wechsler Adult Intelligence Scale-Revised; Assoc. Learning,  
4 Association learning; FAB, frontal assessment battery; SDS, self-rating depression scale.  
5 Values are mean (SD) or n (%). a p-value of students' t-test or  $\chi^2$  test

6

7
